# Supplementary material
Source: Springer Nature journal article supplement (https://www.springermedizin.de/resource/supplementary/12887_2014_1116_MOESM1_ESM.pdf/9476532)

A.a.

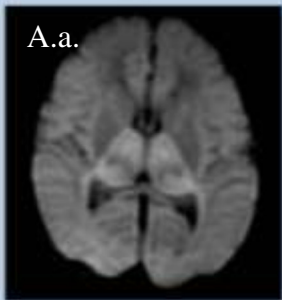

A.b.

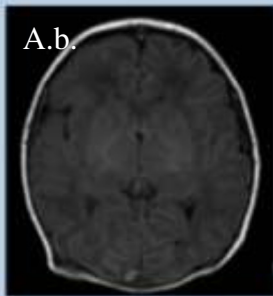

A.c.

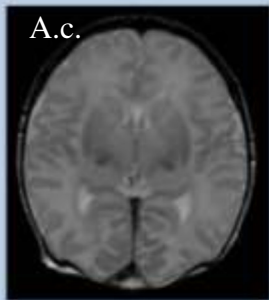

B.a.

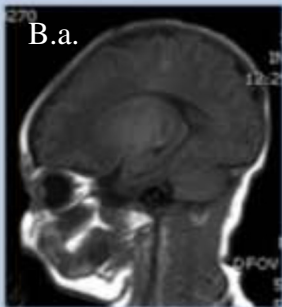

B.b.

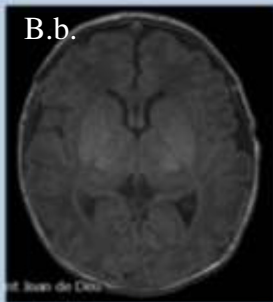

B.c.

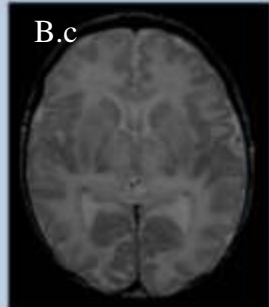

Supplement: MOESM1 [file 9476532]
